# Supplementary material for: Bergen Metrics: composite error metrics for assessing performance of climate models using EURO-CORDEX simulations
Source: Copernicus journal article supplement (doi:10.5194/gmd-2023-134), 2023-08-22
Supplement: Supplementary file 1 [file gmd-2023-134-supplement.pdf]

### Supplementary Figure

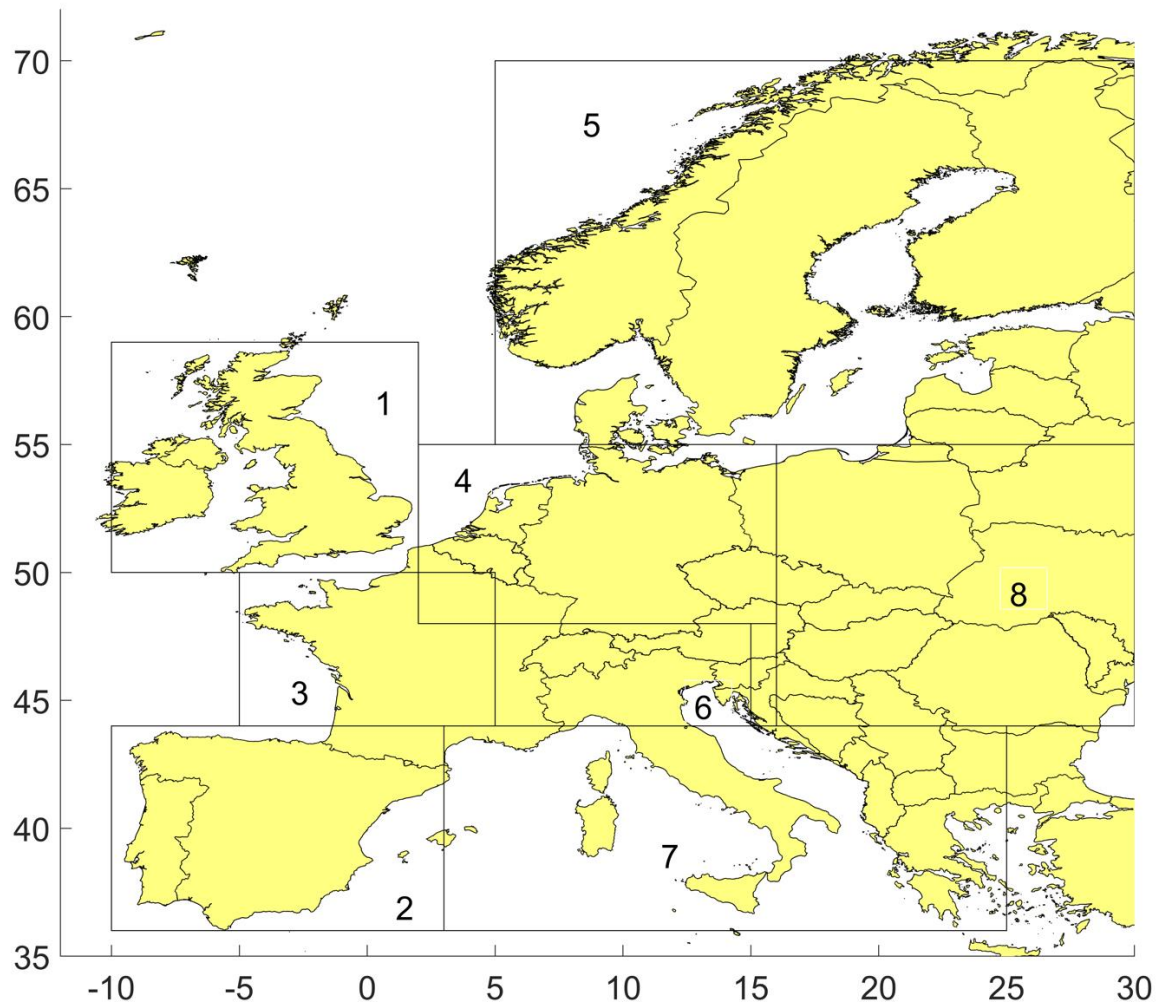

**Figure S1:** The European study region and its subregions: 1) British Isles (BI) 2) Iberian Peninsula (IP) 3) France (FR) 4) Mid-Europe (ME) 5) Scandinavia (SC) 6) Alps (AL) 7) Mediterranean 8) Eastern Europe (EA)

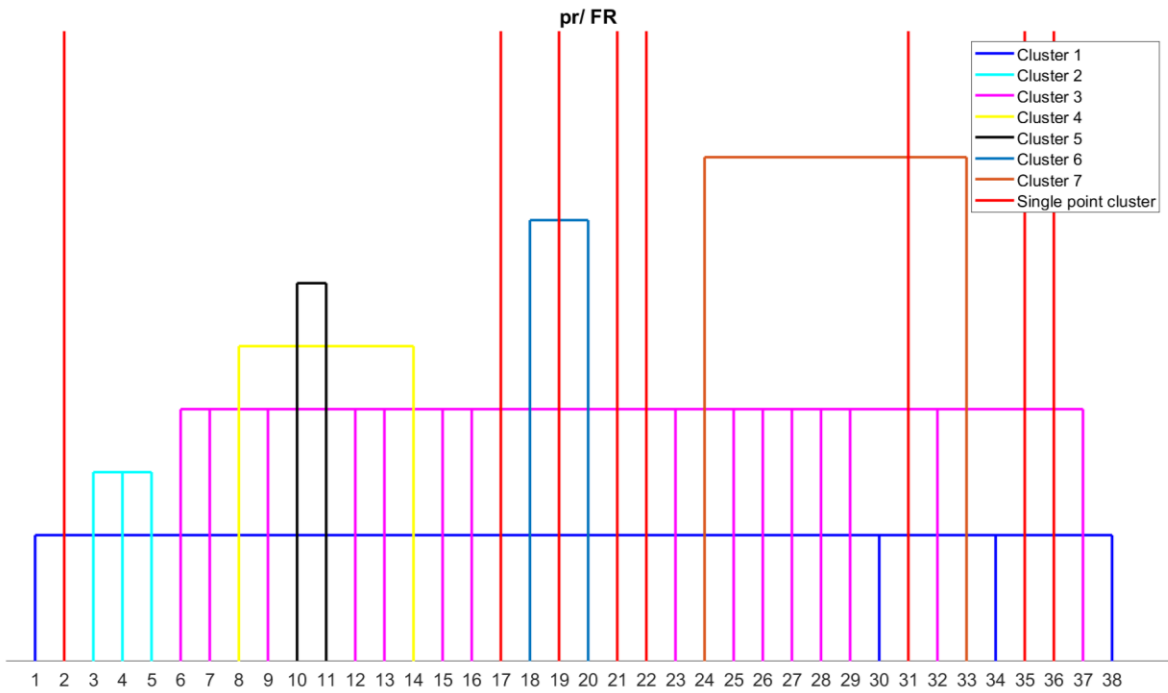

**Figure S2:** Clustering of error metrics using precipitation (pr) data for France (FR) region. Each error metric can be identified by the number using Table S3.

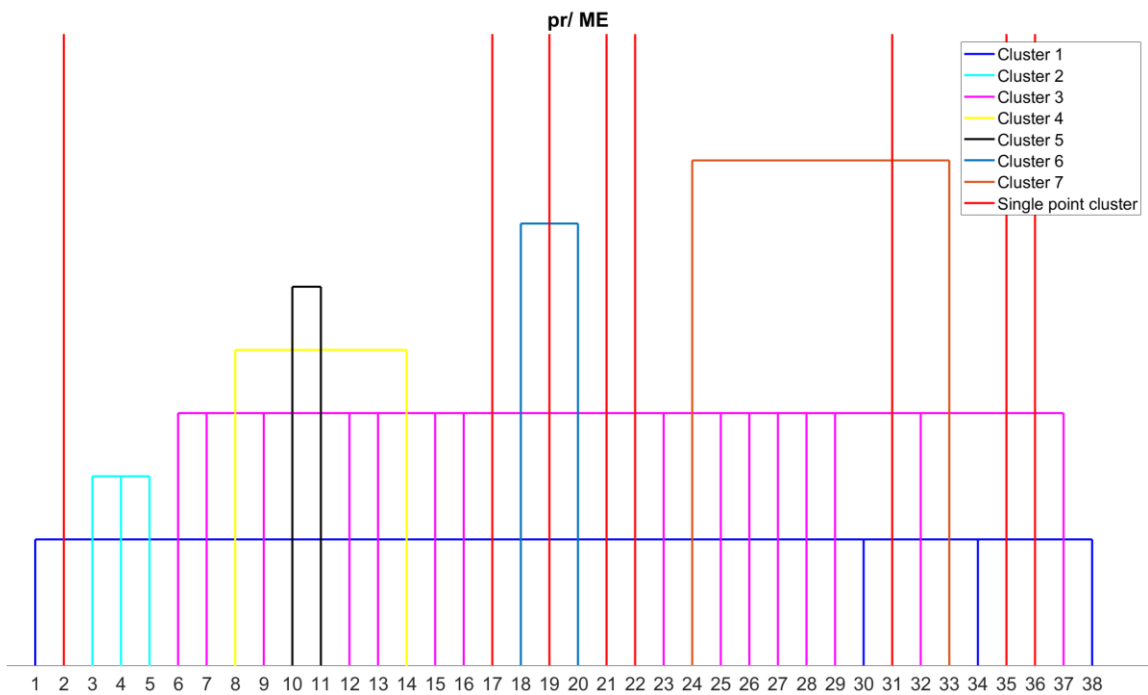

**Figure S3:** Clustering of error metrics using precipitation (pr) data for Mid-Europe (ME) region. Each error metric can be identified by the number using Table S3.

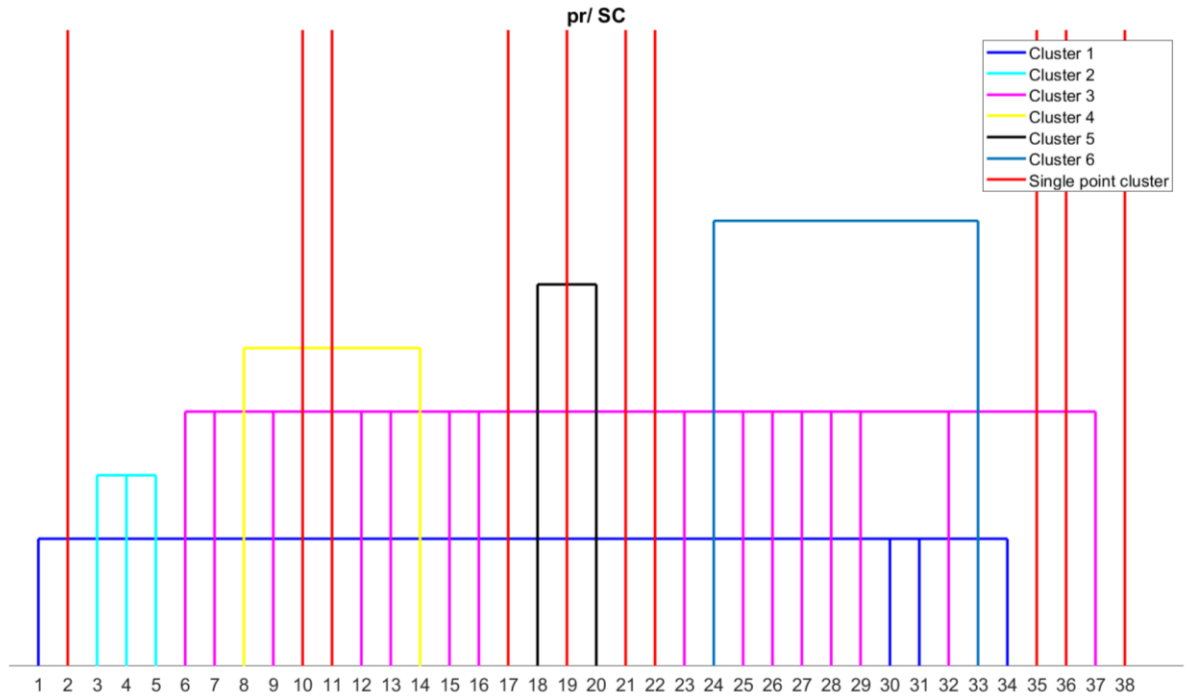

**Figure S4:** Clustering of error metrics using precipitation (pr) data for Scandinavia (SC) region. Each error metric can be identified by the number using Table S3.

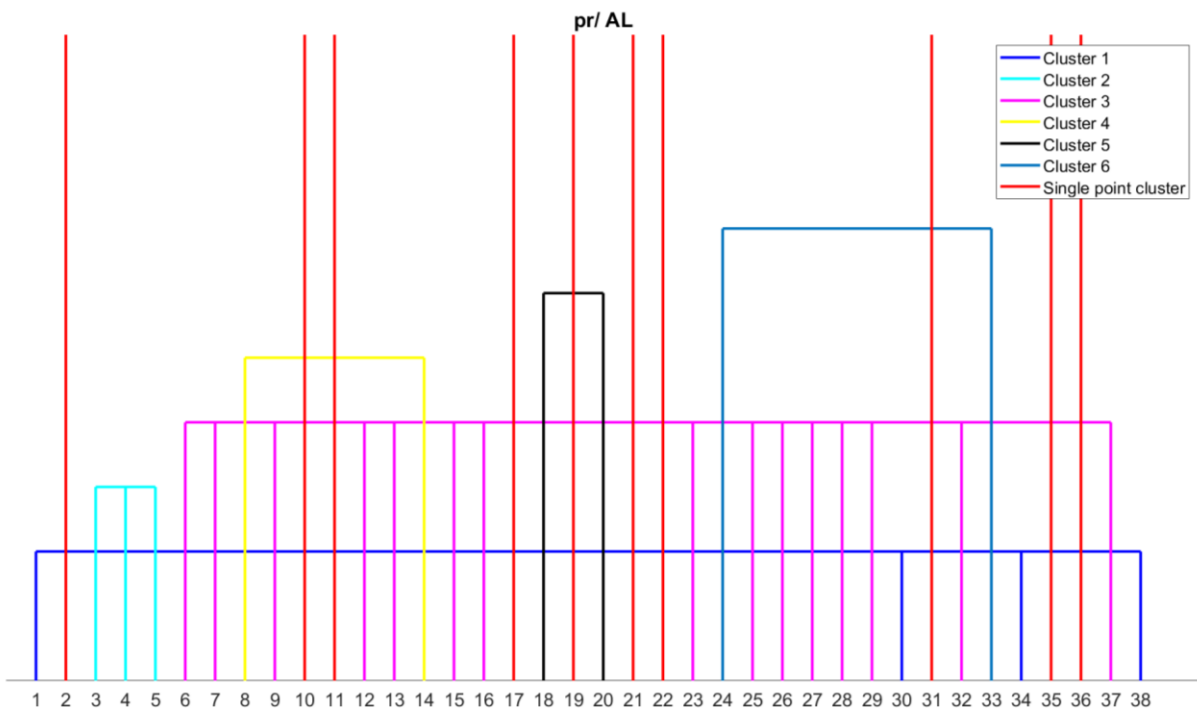

**Figure S5:** Clustering of error metrics using precipitation (pr) data for Alps (AL) region. Each error metric can be identified by the number using Table S3.

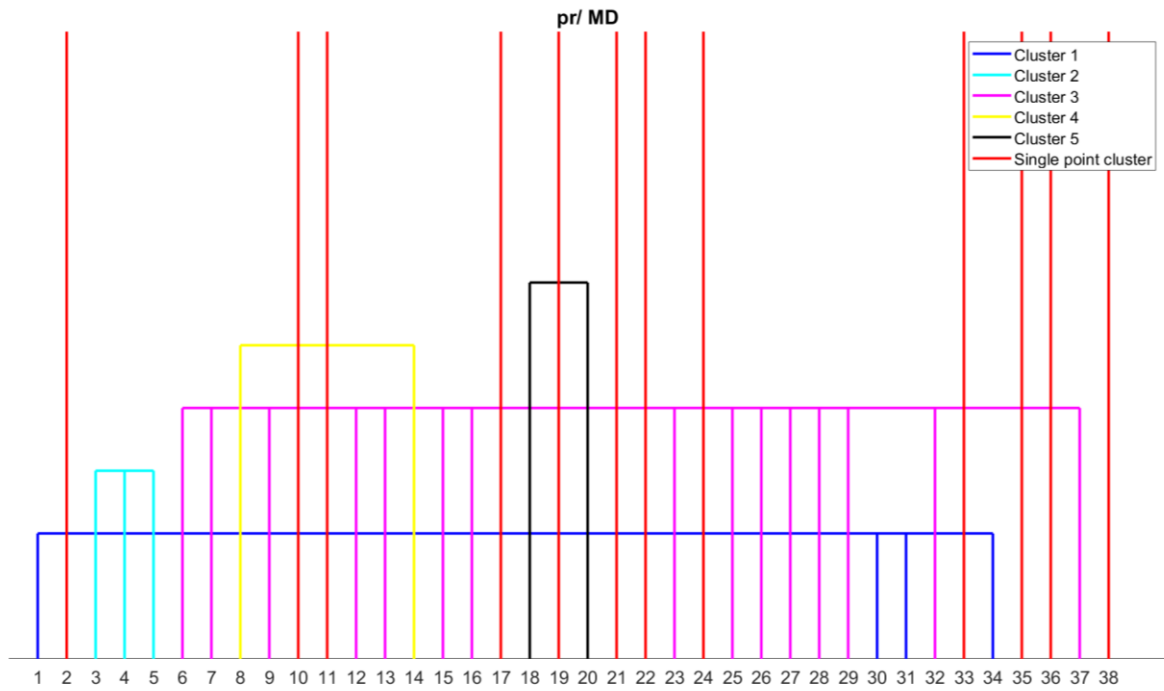

**Figure S6:** Clustering of error metrics using precipitation (pr) data for Mediterranean (MD) region. Each error metric can be identified by the number using Table S3.

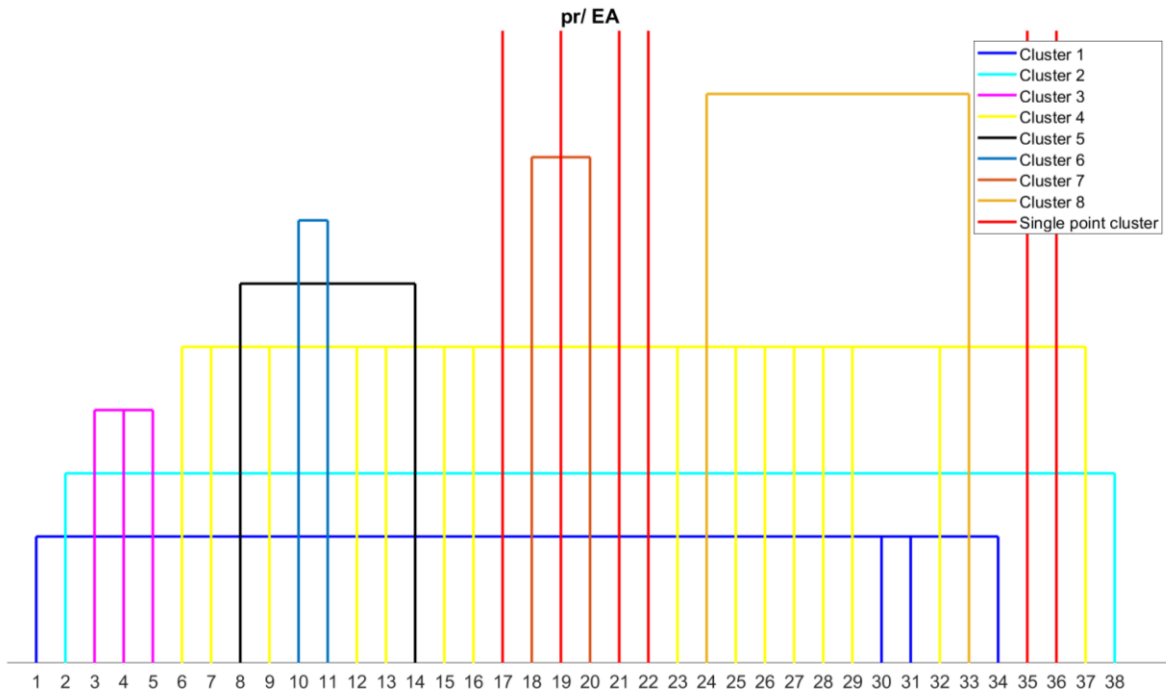

**Figure S7:** Clustering of error metrics using precipitation (pr) data for Eastern Europe (EA) region. Each error metric can be identified by the number using Table S3.

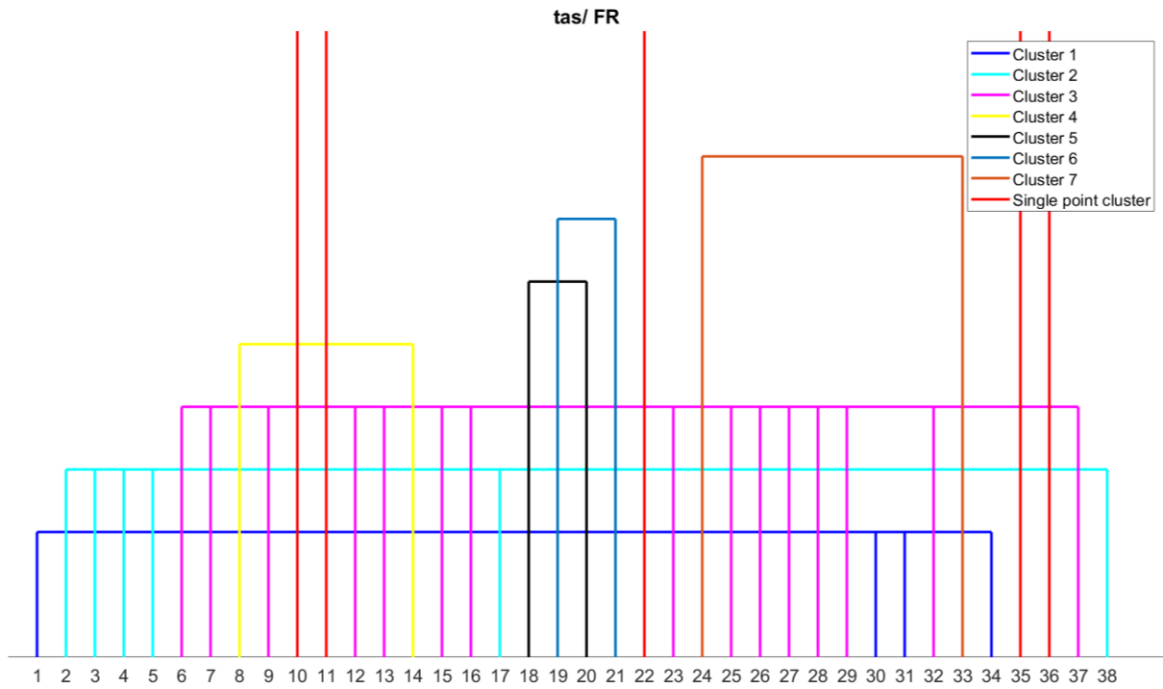

**Figure S8:** Clustering of error metrics using temperature (tas) data for France (FR) region. Each error metric can be identified by the number using Table S3.

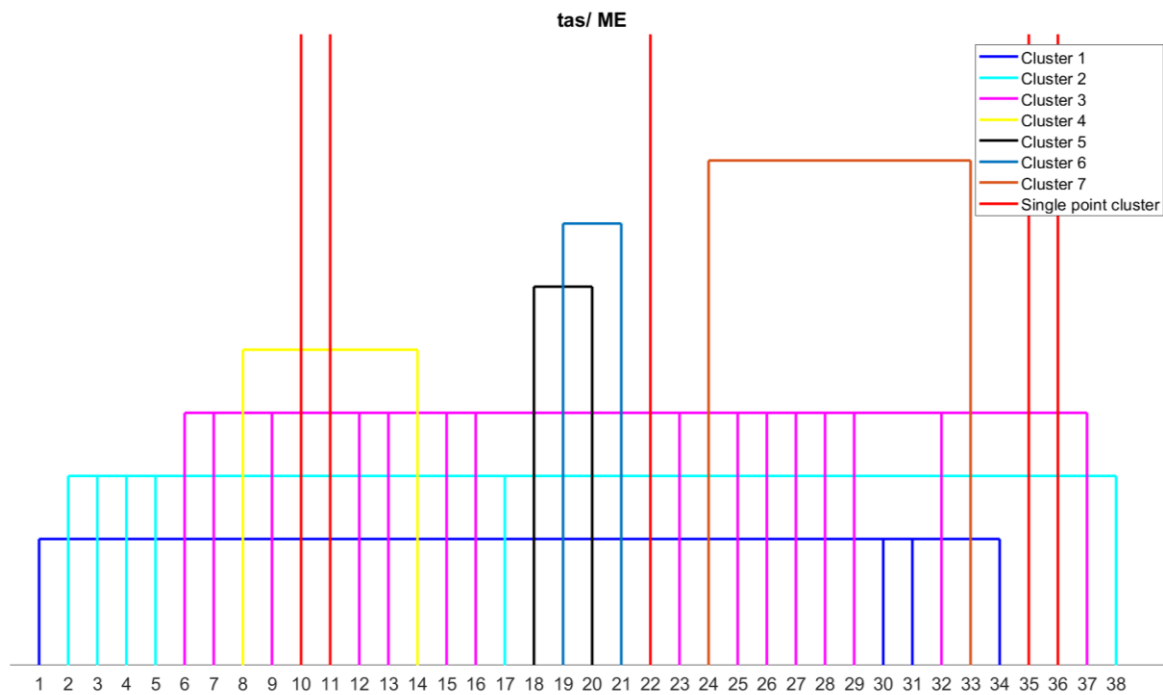

**Figure S9:** Clustering of error metrics using temperature (tas) data for Mid-Europe (ME) region. Each error metric can be identified by the number using Table S3.

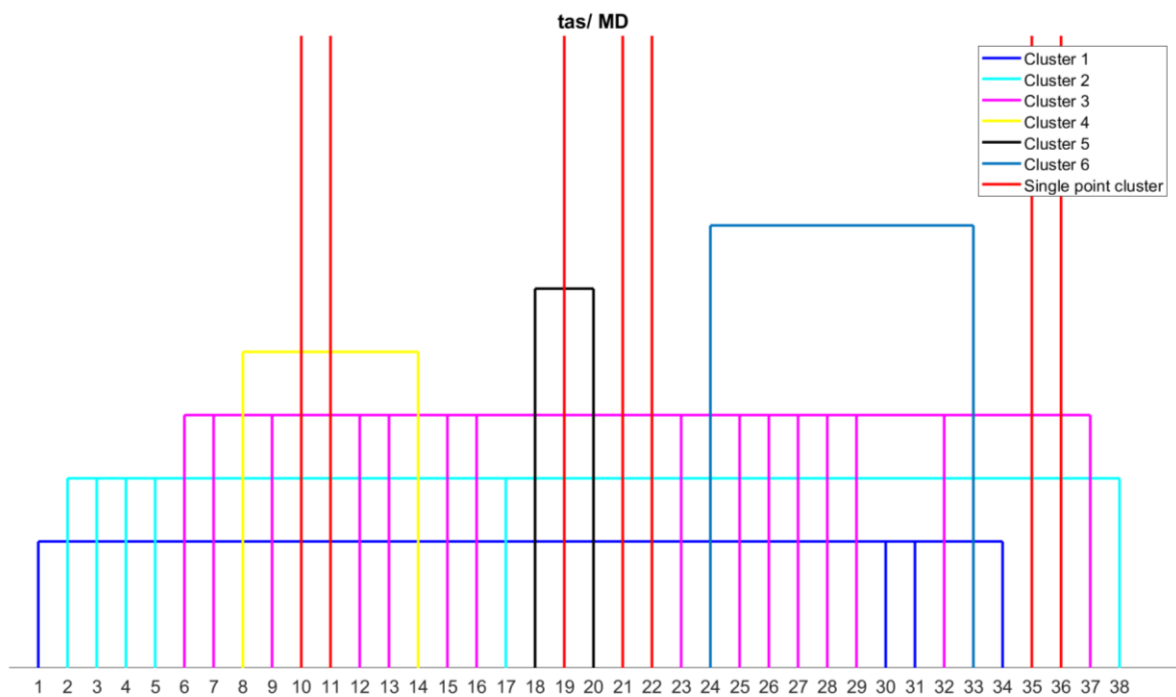

**Figure S10:** Clustering of error metrics using temperature (tas) data for Mediterranean (MD) region. Each error metric can be identified by the number using Table S3.

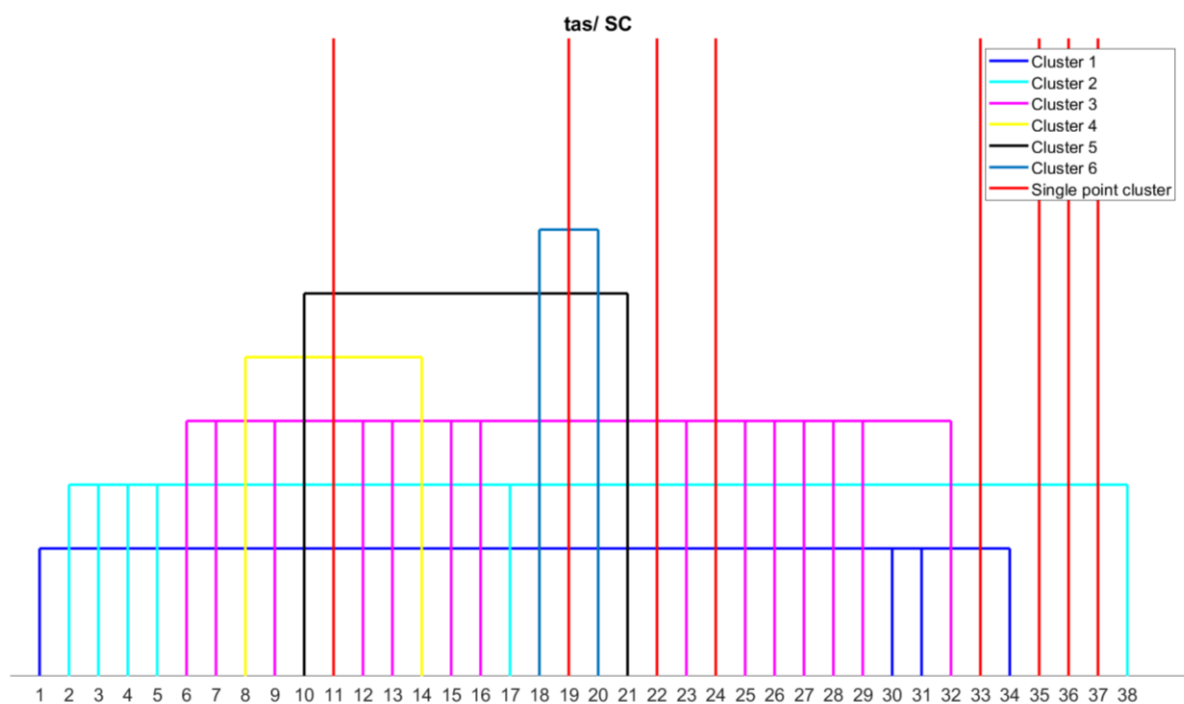

**Figure S11:** Clustering of error metrics using temperature (tas) data for Scandinavia (SC) region. Each error metric can be identified by the number using Table S3.

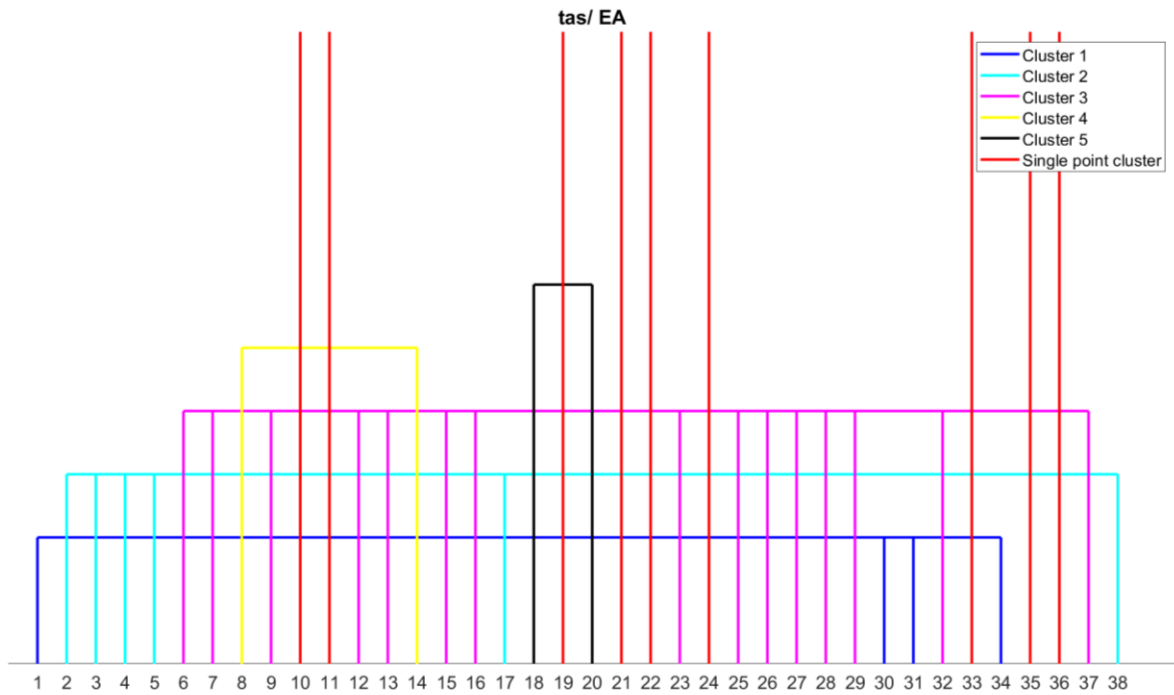

**Figure S12:** Clustering of error metrics using temperature (tas) data for Eastern Europe (EA) region. Each error metric can be identified by the number using Table S3.

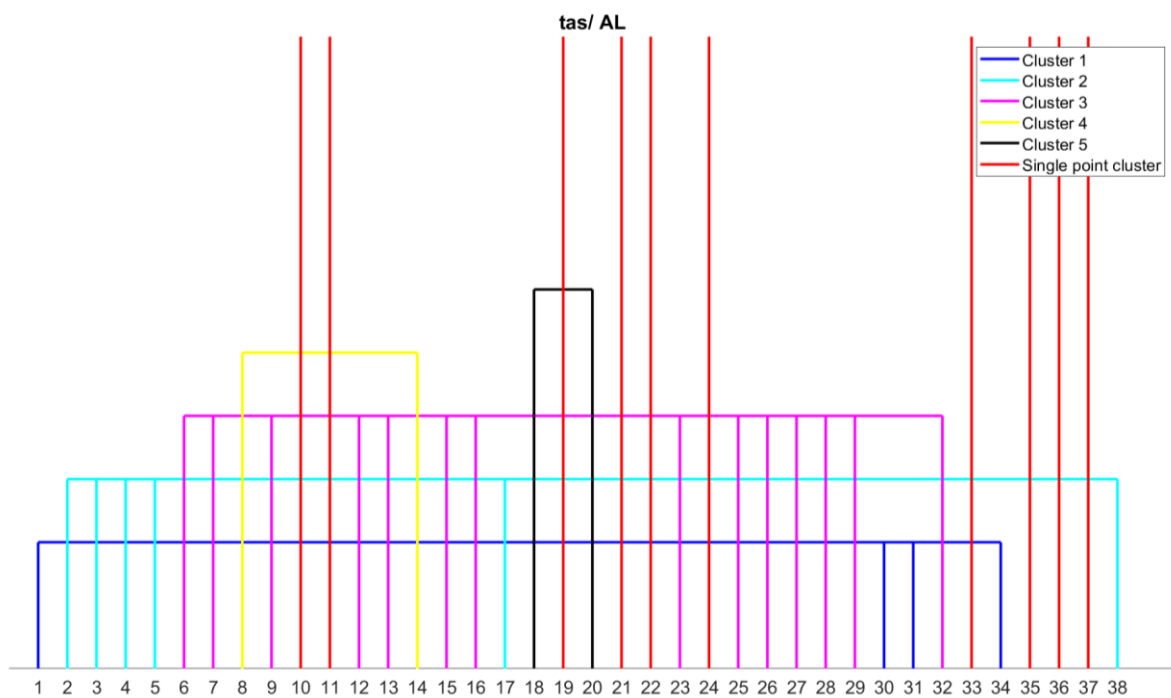

**Figure S13:** Clustering of error metrics using temperature (tas) data for Alps (AL) region. Each error metric can be identified by the number using Table S3.

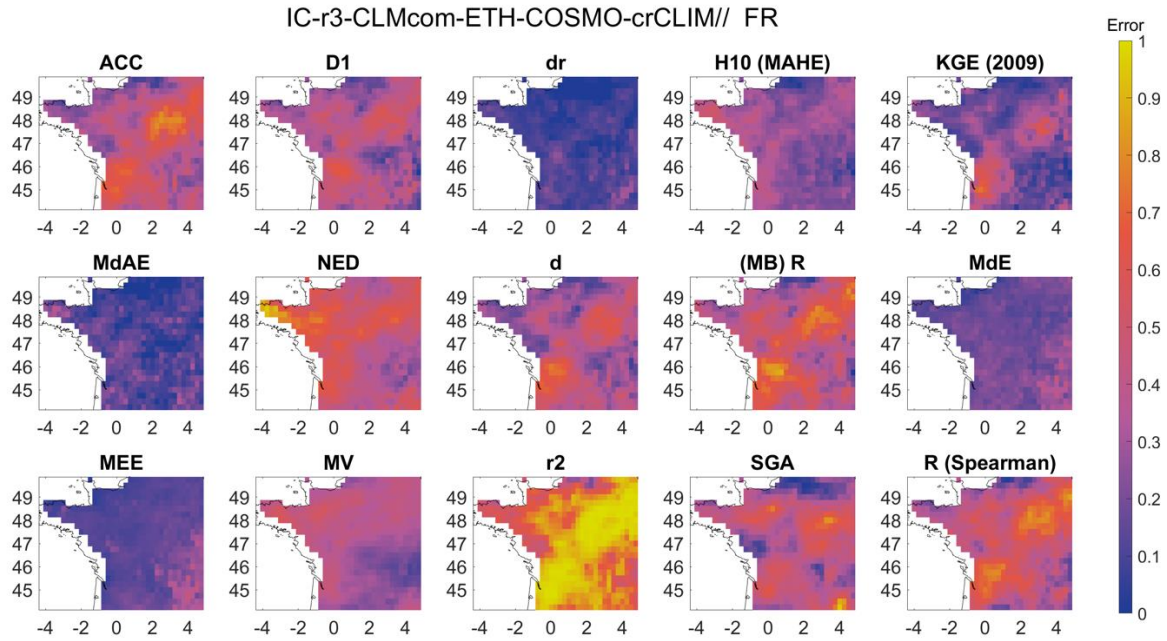

**Figure S14:** Spatial distribution of the error metrics used to compute the Bergen metric for precipitation and for France (FR) region. The error metrics have been labeled by the abbreviation and the corresponding error metrics can be identified from Table S3.

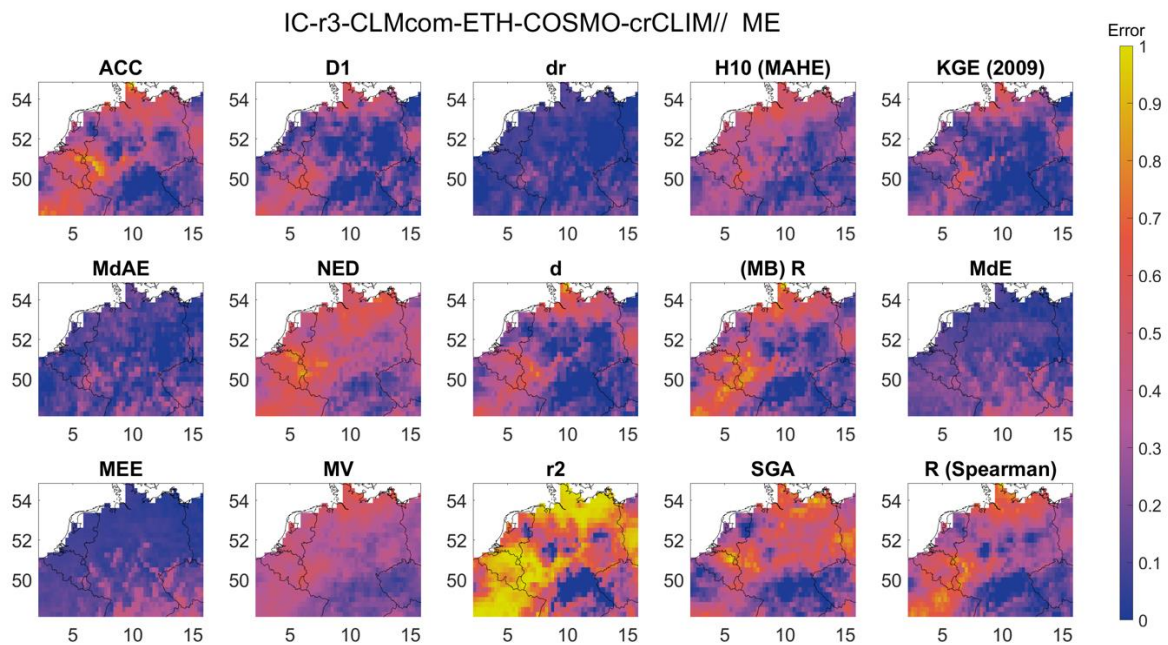

**Figure S15:** Spatial distribution of the error metrics used to compute the Bergen metric for precipitation and for Mid-Europe (ME) region. The error metrics have been labeled by the abbreviation and the corresponding error metrics can be identified from Table S3.



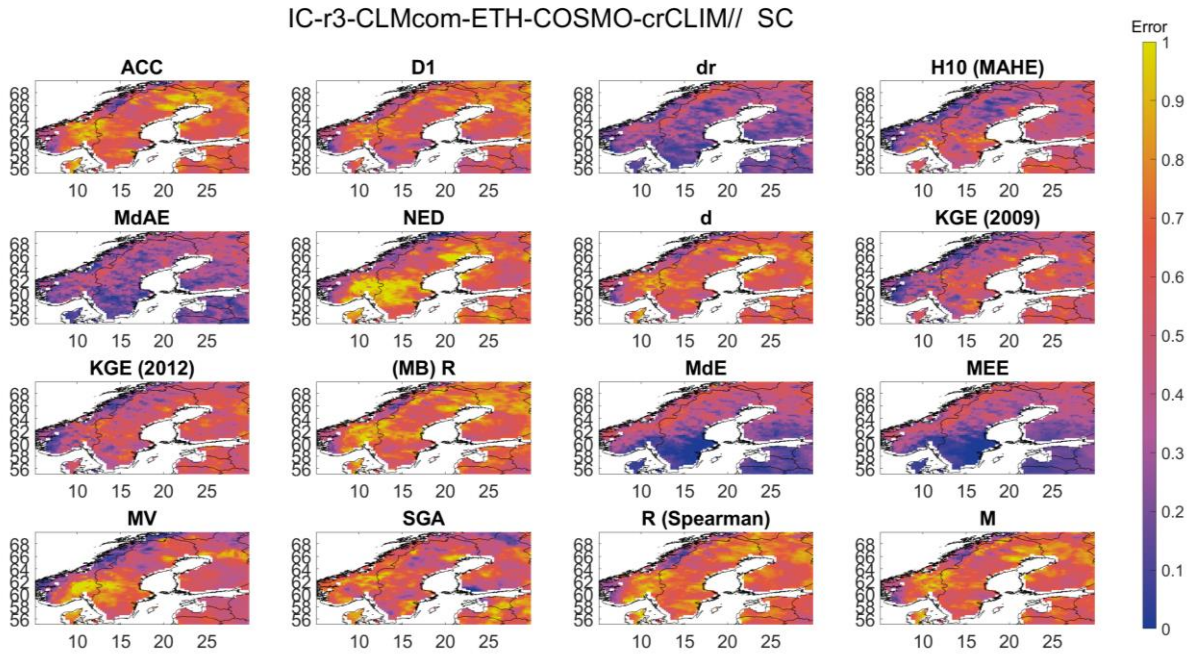

**Figure S16:** Spatial distribution of the error metrics used to compute the Bergen metric for precipitation and for Scandinavia (SC) region. The error metrics have been labeled by the abbreviation and the corresponding error metrics can be identified from Table S3.

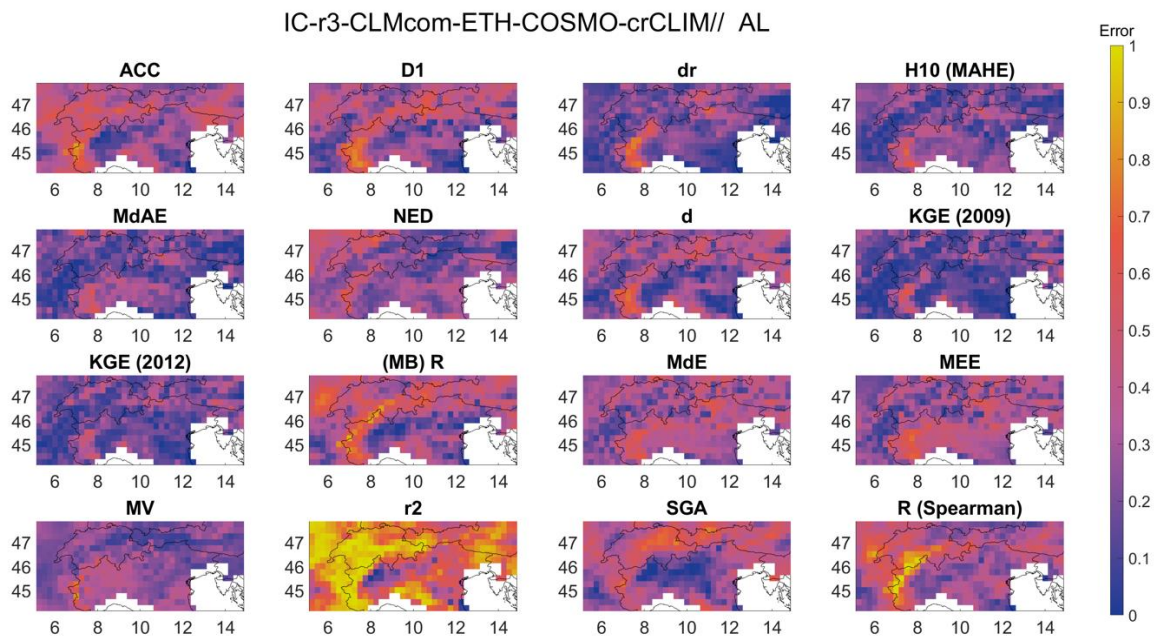

**Figure S17:** Spatial distribution of the error metrics used to compute the Bergen metric for precipitation and for Alps (AL) region. The error metrics have been labeled by the abbreviation and the corresponding error metrics can be identified from Table S3.

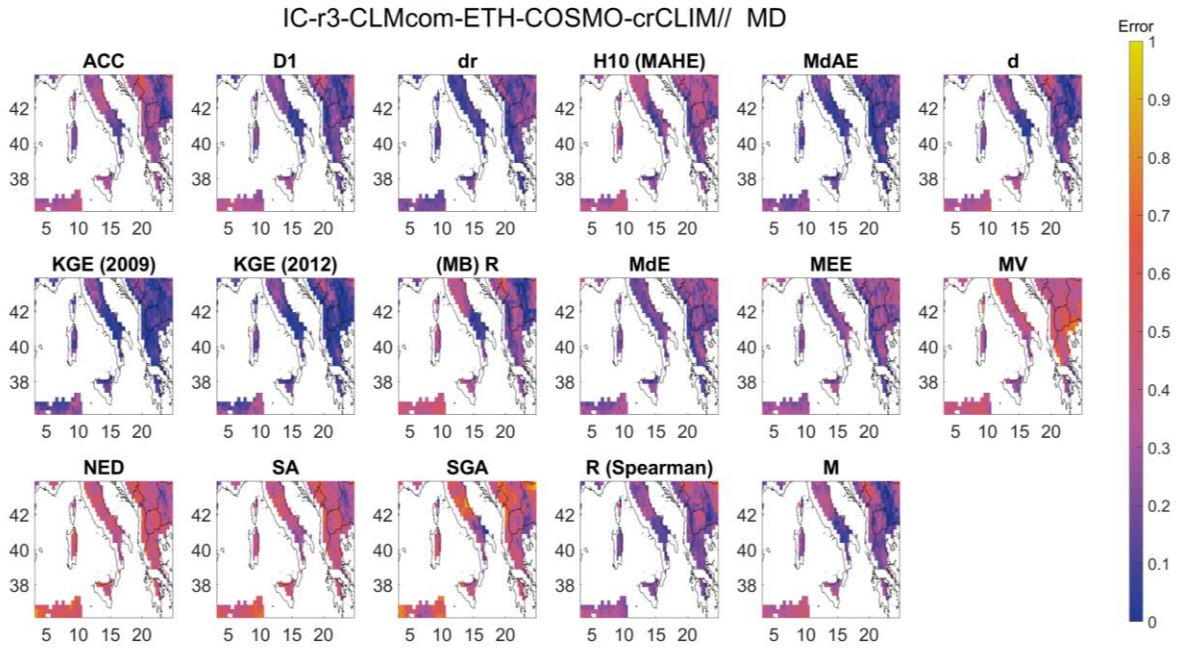

**Figure S18:** Spatial distribution of the error metrics used to compute the Bergen metric for precipitation and for Mediterranean (MD) region. The error metrics have been labeled by the abbreviation and the corresponding error metrics can be identified from Table S3.

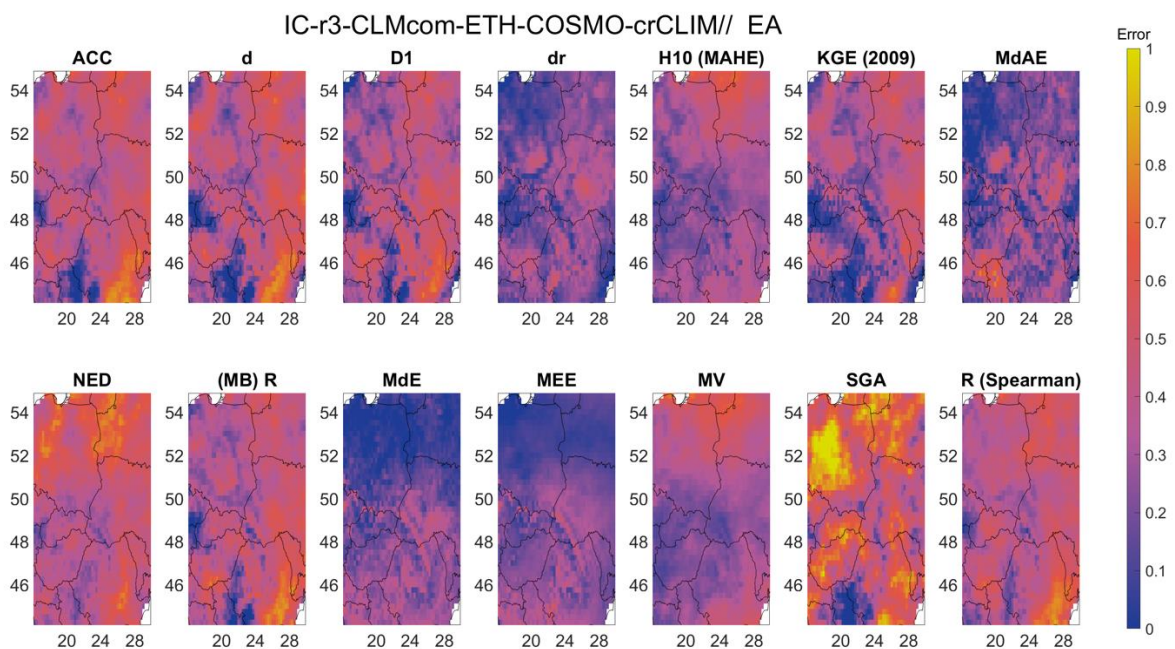

**Figure S19:** Spatial distribution of the error metrics used to compute the Bergen metric for precipitation and for Eastern Europe (EA) region. The error metrics have been labeled by the abbreviation and the corresponding error metrics can be identified from Table S3.

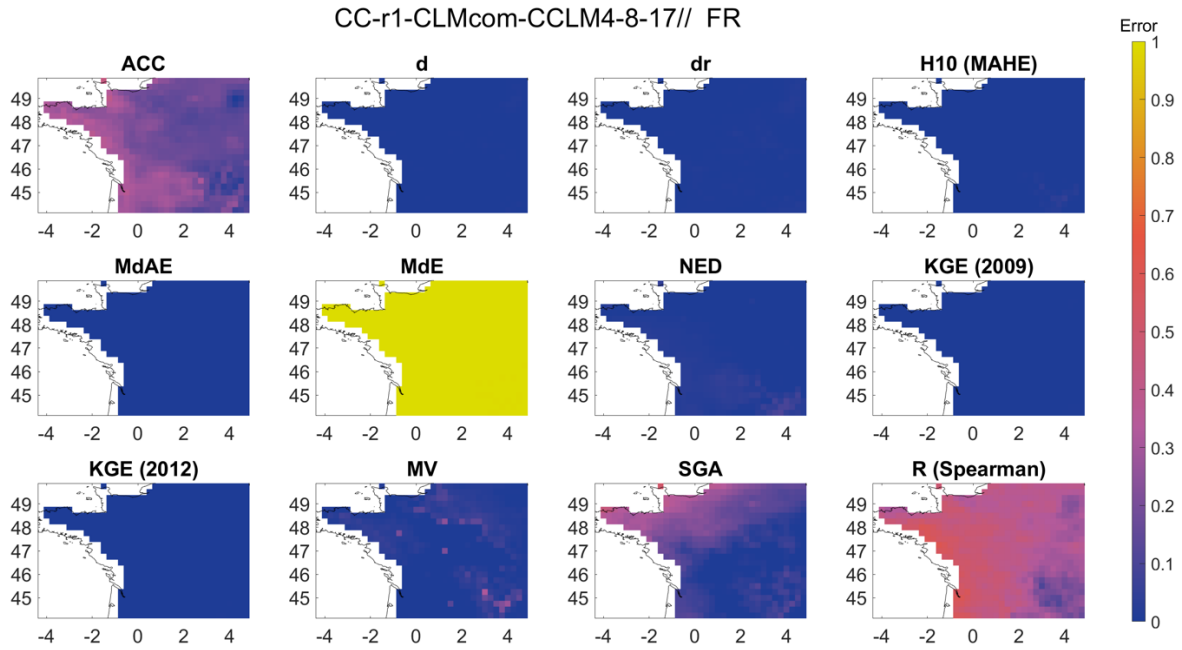

**Figure S20:** Spatial distribution of the error metrics used to compute the Bergen metric for temperature and for France (FR) region. The error metrics have been labeled by the abbreviation and the corresponding error metrics can be identified from Table S3.

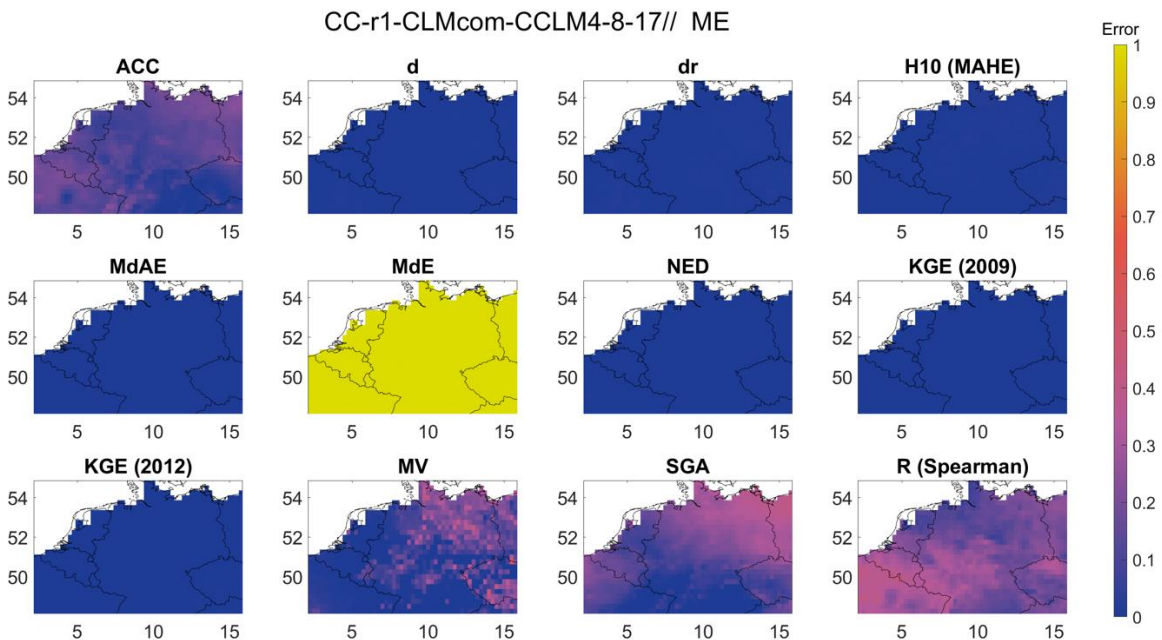

**Figure S21:** Spatial distribution of the error metrics used to compute the Bergen metric for temperature and for Mid-Europe (ME) region. The error metrics have been labeled by the abbreviation and the corresponding error metrics can be identified from Table S3.

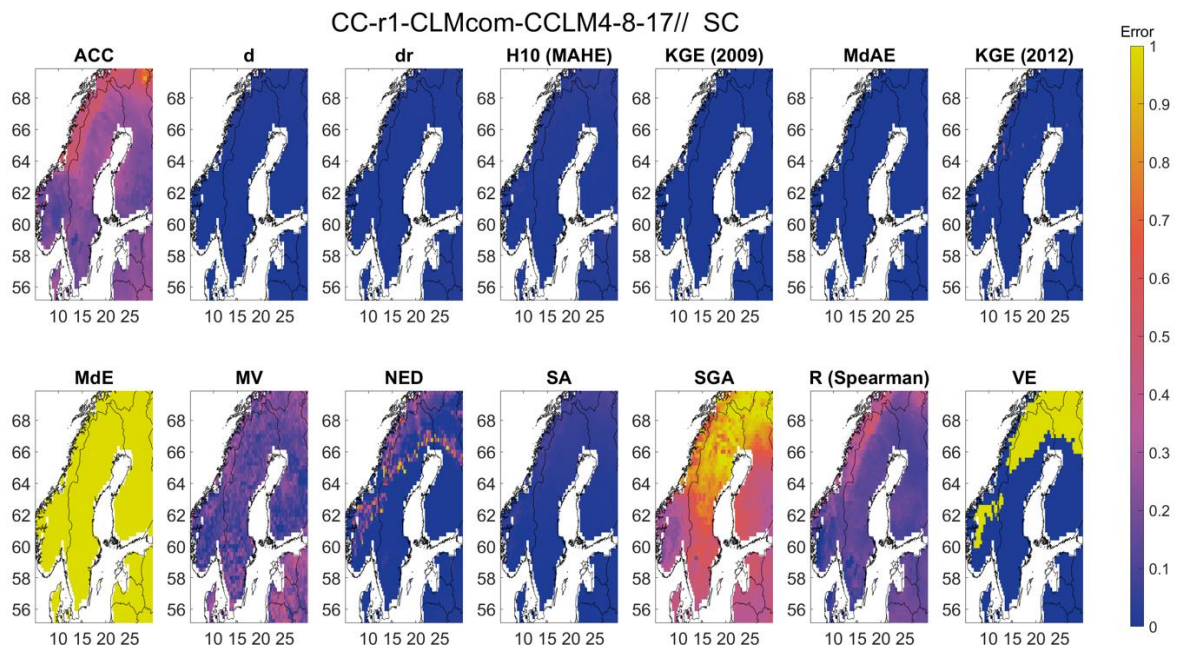

**Figure S22:** Spatial distribution of the error metrics used to compute the Bergen metric for temperature and for Scandinavia (SC) region. The error metrics have been labeled by the abbreviation and the corresponding error metrics can be identified from Table S3.

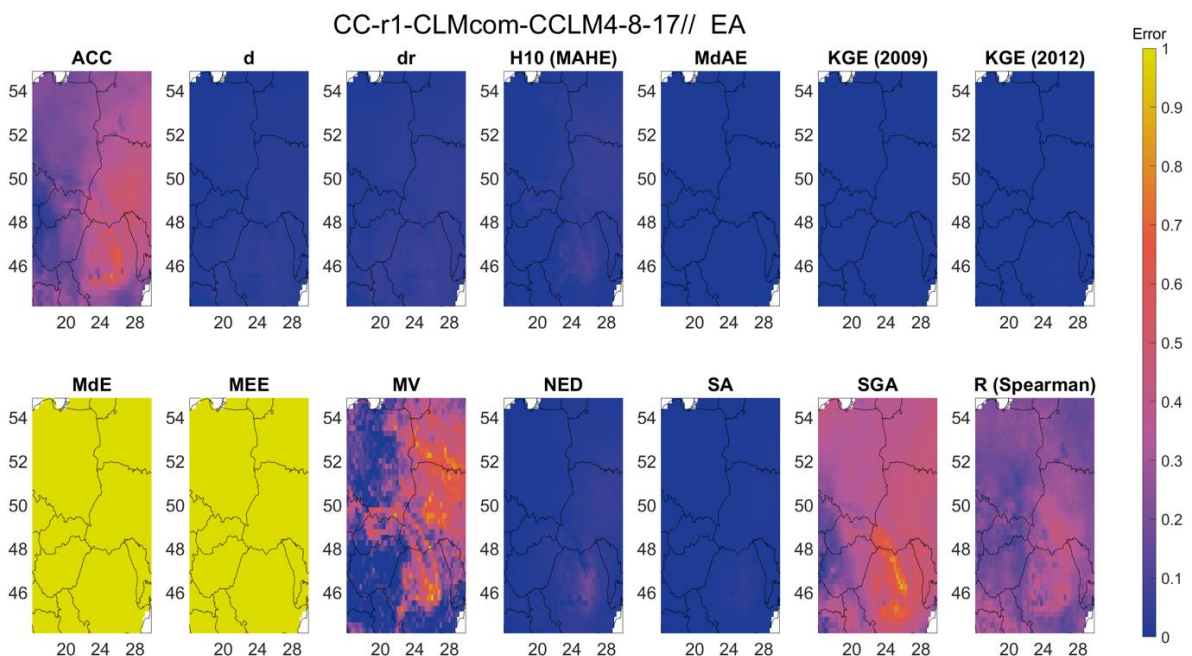

**Figure S23:** Spatial distribution of the error metrics used to compute the Bergen metric for temperature and for Eastern Europe (EA) region. The error metrics have been labeled by the abbreviation and the corresponding error metrics can be identified from Table S3.

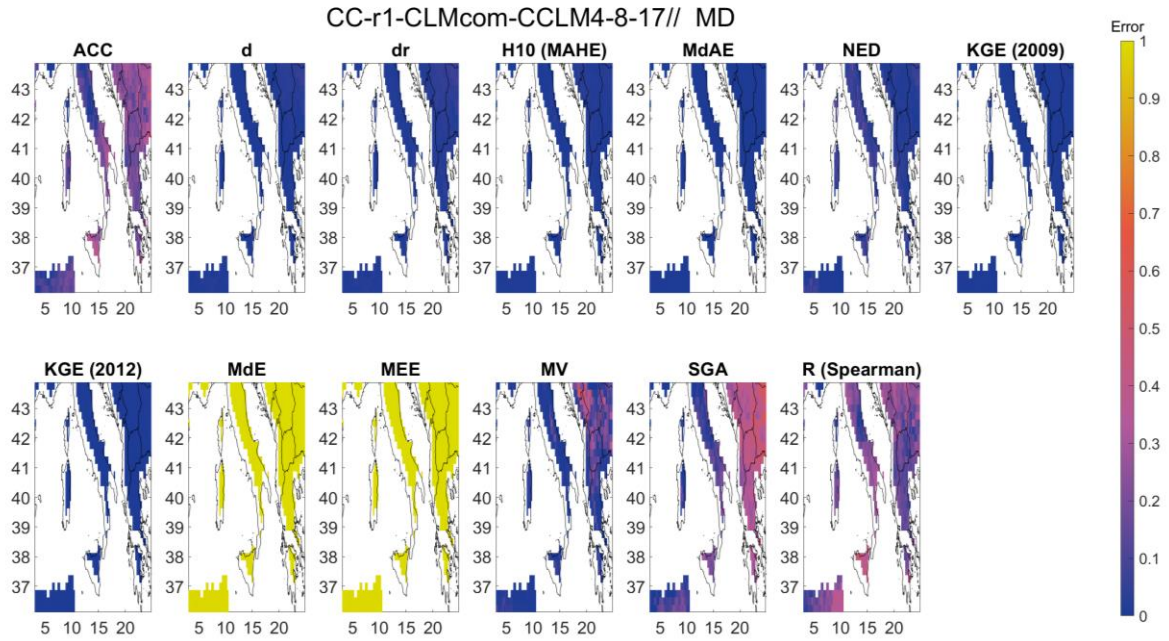

**Figure S24:** Spatial distribution of the error metrics used to compute the Bergen metric for temperature and for Mediterranean (MD) region. The error metrics have been labeled by the abbreviation and the corresponding error metrics can be identified from Table S3.

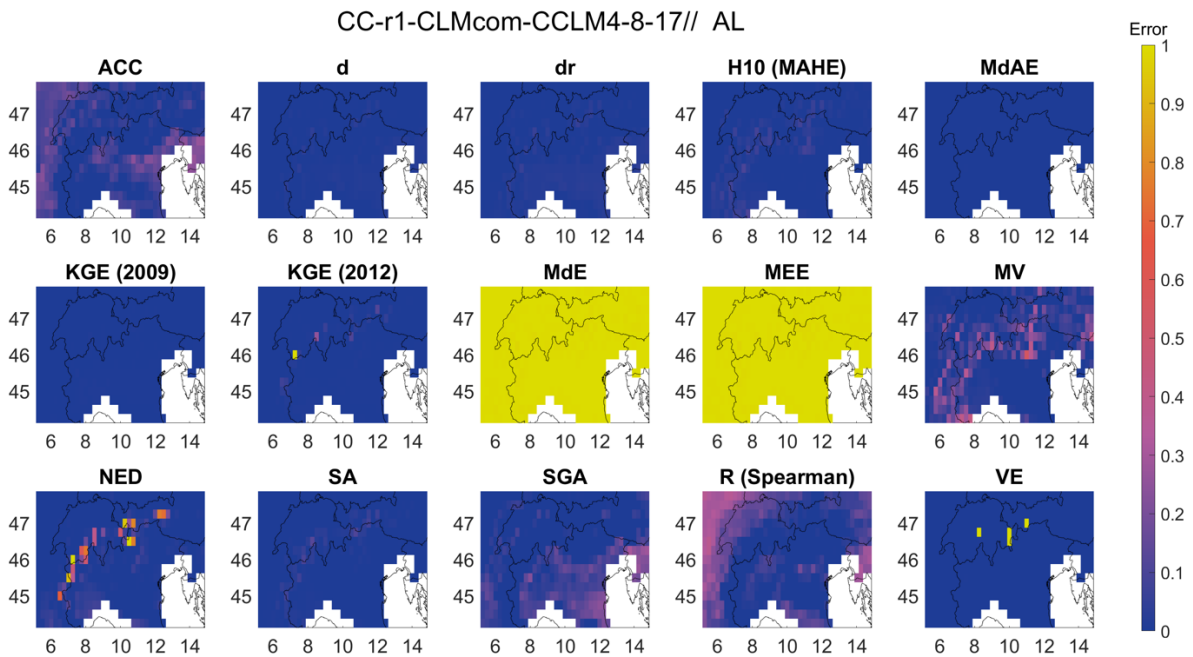

**Figure S25:** Spatial distribution of the error metrics used to compute the Bergen metric for temperature and for Alps (AL) region. The error metrics have been labeled by the abbreviation and the corresponding error metrics can be identified from Table S3.

### Supplementary Table

**Table S1:** List of global climate models used in the study

| <b>id</b> | <b>GCM</b>                    | <b>Used Realization</b> | <b>Number of RCM<br/>(Precipitation and<br/>Mean Temperature)</b> |
|-----------|-------------------------------|-------------------------|-------------------------------------------------------------------|
| 1         | CCCma-<br>CanESM2             | r1i1p1                  | 4                                                                 |
| 2         | CNRM-<br>CERFACS-<br>CNRM-CM5 | r1i1p1                  | 13                                                                |
| 3         | ICHEC-EC-<br>EARTH            | r1i1p1                  | 6                                                                 |
|           |                               | r3i1p1                  | 5                                                                 |
|           |                               | r12i1p1                 | 11                                                                |
| 4         | IPSL-IPSL-<br>CM5A-LR         | r1i1p1                  | 1                                                                 |
| 5         | IPSL-IPSL-<br>CM5A-MR         | r1i1p1                  | 6                                                                 |
| 6         | MIROC-<br>MIROC5              | r1i1p1                  | 4                                                                 |
| 7         | MOHC-<br>HadGEM2-ES           | r1i1p1                  | 13                                                                |
| 8         | MPI-M-MPI-<br>ESM-LR          | r1i1p1                  | 12                                                                |
|           |                               | r2i1p1                  | 4                                                                 |
|           |                               | r3i1p1                  | 3                                                                 |
| 9         | NCC-<br>NorESM1-M             | r1i1p1                  | 6                                                                 |
| 10        | NOAA-GFDL-<br>GFDL-ESM2G      | r1i1p1                  | 1                                                                 |

**Table S2:** List of climate models used in the study

| Number | Model                                                                               |
|--------|-------------------------------------------------------------------------------------|
| 1      | EUR-11_CCCma-CanESM2_historical_r1i1p1_CLMcom-CCLM4-8-17_v1                         |
| 2      | EUR-11_CCCma-CanESM2_historical_r1i1p1_GERICS-REMO2015_v1                           |
| 3      | own_ReKliEs-DWD_CCCma-CanESM2_historical_r1i1p1_CLMcom-CCLM4-8-17_v1_EUR-11         |
| 4      | own_ReKliEs-DWD_CCCma-CanESM2_historical_r1i1p1_GERICS-REMO2015_v1_EUR-11           |
| 5      | EUR-11_CNRM-CERFACS-CNRM-CM5_historical_r1i1p1_CLMcom-CCLM4-8-17_v1                 |
| 6      | EUR-11_CNRM-CERFACS-CNRM-CM5_historical_r1i1p1_CLMcom-ETH-COSMO-crCLIM-v1-1_v1      |
| 7      | EUR-11_CNRM-CERFACS-CNRM-CM5_historical_r1i1p1_CNRM-ALADIN53_v1                     |
| 8      | EUR-11_CNRM-CERFACS-CNRM-CM5_historical_r1i1p1_CNRM-ALADIN63_v2                     |
| 9      | EUR-11_CNRM-CERFACS-CNRM-CM5_historical_r1i1p1_DMI-HIRHAM5_v2                       |
| 10     | EUR-11_CNRM-CERFACS-CNRM-CM5_historical_r1i1p1_GERICS-REMO2015_v1                   |
| 11     | EUR-11_CNRM-CERFACS-CNRM-CM5_historical_r1i1p1_GERICS-REMO2015_v2                   |
| 12     | EUR-11_CNRM-CERFACS-CNRM-CM5_historical_r1i1p1_KNMI-RACMO22E_v2                     |
| 13     | EUR-11_CNRM-CERFACS-CNRM-CM5_historical_r1i1p1_RMIB-UGent-ALARO-0_v1                |
| 14     | EUR-11_CNRM-CERFACS-CNRM-CM5_historical_r1i1p1_SMHI-RCA4_v1                         |
| 15     | own_ReKliEs-DWD_CNRM-CERFACS-CNRM-CM5_historical_r1i1p1_CLMcom-CCLM4-8-17_v1_EUR-11 |
| 16     | own_ReKliEs-DWD_CNRM-CERFACS-CNRM-CM5_historical_r1i1p1_GERICS-REMO2015_v1_EUR-11   |
| 17     | own_ReKliEs-DWD_CNRM-CERFACS-CNRM-CM5_historical_r1i1p1_SMHI-RCA4_v1_EUR-11         |
| 18     | EUR-11_ICHEC-EC-EARTH_historical_r12i1p1_CLMcom-CCLM4-8-17_v1                       |
| 19     | EUR-11_ICHEC-EC-EARTH_historical_r12i1p1_CLMcom-ETH-COSMO-crCLIM-v1-1_v1            |
| 20     | EUR-11_ICHEC-EC-EARTH_historical_r12i1p1_DMI-HIRHAM5_v1                             |
| 21     | EUR-11_ICHEC-EC-EARTH_historical_r12i1p1_GERICS-REMO2015_v1                         |
| 22     | EUR-11_ICHEC-EC-EARTH_historical_r12i1p1_KNMI-RACMO22E_v1                           |
| 23     | EUR-11_ICHEC-EC-EARTH_historical_r12i1p1_SMHI-RCA4_v1                               |
| 24     | EUR-11_ICHEC-EC-EARTH_historical_r12i1p1_UHOH-WRF361H_v1                            |
| 25     | own_ReKliEs-DWD_ICHEC-EC-EARTH_historical_r12i1p1_CLMcom-CCLM4-8-17_v1_EUR-11       |
| 26     | own_ReKliEs-DWD_ICHEC-EC-EARTH_historical_r12i1p1_GERICS-REMO2015_v1_EUR-11         |
| 27     | own_ReKliEs-DWD_ICHEC-EC-EARTH_historical_r12i1p1_KNMI-RACMO22E_v1_EUR-11           |

|    |                                                                                   |
|----|-----------------------------------------------------------------------------------|
| 28 | own_ReKliEs-DWD_ICHEC-EC-EARTH_historical_r1i1p1_SMHI-RCA4_v1_EUR-11              |
| 29 | EUR-11_ICHEC-EC-EARTH_historical_r1i1p1_CLMcom-ETH-COSMO-crCLIM-v1-1_v1           |
| 30 | EUR-11_ICHEC-EC-EARTH_historical_r1i1p1_DMI-HIRHAM5_v1                            |
| 31 | EUR-11_ICHEC-EC-EARTH_historical_r1i1p1_KNMI-RACMO22E_v1                          |
| 32 | EUR-11_ICHEC-EC-EARTH_historical_r1i1p1_SMHI-RCA4_v1                              |
| 33 | own_ReKliEs-DWD_ICHEC-EC-EARTH_historical_r1i1p1_KNMI-RACMO22E_v1_EUR-11          |
| 34 | own_ReKliEs-DWD_ICHEC-EC-EARTH_historical_r1i1p1_UHOH-WRF361H_v1_EUR-11           |
| 35 | EUR-11_ICHEC-EC-EARTH_historical_r3i1p1_CLMcom-ETH-COSMO-crCLIM-v1-1_v1           |
| 36 | EUR-11_ICHEC-EC-EARTH_historical_r3i1p1_DMI-HIRHAM5_v2                            |
| 37 | EUR-11_ICHEC-EC-EARTH_historical_r3i1p1_KNMI-RACMO22E_v1                          |
| 38 | EUR-11_ICHEC-EC-EARTH_historical_r3i1p1_SMHI-RCA4_v1                              |
| 39 | own_ReKliEs-DWD_ICHEC-EC-EARTH_historical_r3i1p1_DMI-HIRHAM5_v1_EUR-11            |
| 40 | EUR-11_IPSL-IPSL-CM5A-LR_historical_r1i1p1_GERICS-REMO2015_v1                     |
| 41 | EUR-11_IPSL-IPSL-CM5A-MR_historical_r1i1p1_DMI-HIRHAM5_v1                         |
| 42 | EUR-11_IPSL-IPSL-CM5A-MR_historical_r1i1p1_GERICS-REMO2015_v1                     |
| 43 | EUR-11_IPSL-IPSL-CM5A-MR_historical_r1i1p1_KNMI-RACMO22E_v1                       |
| 44 | EUR-11_IPSL-IPSL-CM5A-MR_historical_r1i1p1_SMHI-RCA4_v1                           |
| 45 | own_ReKliEs-DWD_IPSL-IPSL-CM5A-MR_historical_r1i1p1_IPSL-INERIS-WRF331F_v1_EUR-11 |
| 46 | own_ReKliEs-DWD_IPSL-IPSL-CM5A-MR_historical_r1i1p1_SMHI-RCA4_v1_EUR-11           |
| 47 | EUR-11_MIROC-MIROC5_historical_r1i1p1_CLMcom-CCLM4-8-17_v1                        |
| 48 | EUR-11_MIROC-MIROC5_historical_r1i1p1_GERICS-REMO2015_v1                          |
| 49 | own_ReKliEs-DWD_MIROC-MIROC5_historical_r1i1p1_CLMcom-CCLM4-8-17_v1_EUR-11        |
| 50 | own_ReKliEs-DWD_MIROC-MIROC5_historical_r1i1p1_GERICS-REMO2015_v1_EUR-11          |
| 51 | EUR-11_MOHC-HadGEM2-ES_historical_r1i1p1_CLMcom-CCLM4-8-17_v1                     |
| 52 | EUR-11_MOHC-HadGEM2-ES_historical_r1i1p1_CLMcom-ETH-COSMO-crCLIM-v1-1_v1          |
| 53 | EUR-11_MOHC-HadGEM2-ES_historical_r1i1p1_CNRM-ALADIN63_v1                         |
| 54 | EUR-11_MOHC-HadGEM2-ES_historical_r1i1p1_DMI-HIRHAM5_v2_mon                       |
| 55 | EUR-11_MOHC-HadGEM2-ES_historical_r1i1p1_GERICS-REMO2015_v1                       |
| 56 | EUR-11_MOHC-HadGEM2-ES_historical_r1i1p1_KNMI-RACMO22E_v2_mon                     |
| 57 | EUR-11_MOHC-HadGEM2-ES_historical_r1i1p1_SMHI-RCA4_v1                             |
| 58 | EUR-11_MOHC-HadGEM2-ES_historical_r1i1p1_UHOH-WRF361H_v1                          |
| 59 | own_ReKliEs-DWD_MOHC-HadGEM2-ES_historical_r1i1p1_CLMcom-CCLM4-8-17_v1_EUR-11     |
| 60 | own_ReKliEs-DWD_MOHC-HadGEM2-ES_historical_r1i1p1_GERICS-REMO2015_v1_EUR-11       |



|    |                                                                                |
|----|--------------------------------------------------------------------------------|
| 61 | own_ReKliEs-DWD_MOHC-HadGEM2-ES_historical_r1i1p1_KNMI-RACMO22E_v2_EUR-11      |
| 62 | own_ReKliEs-DWD_MOHC-HadGEM2-ES_historical_r1i1p1_SMHI-RCA4_v1_EUR-11          |
| 63 | own_ReKliEs-DWD_MOHC-HadGEM2-ES_historical_r1i1p1_UHOH-WRF361H_v1_EUR-11       |
| 64 | EUR-11_MPI-M-MPI-ESM-LR_historical_r1i1p1_CLMcom-CCLM4-8-17_v1                 |
| 65 | EUR-11_MPI-M-MPI-ESM-LR_historical_r1i1p1_CLMcom-ETH-COSMO-crCLIM-v1-1_v1      |
| 66 | EUR-11_MPI-M-MPI-ESM-LR_historical_r1i1p1_CNRM-ALADIN63_v1                     |
| 67 | EUR-11_MPI-M-MPI-ESM-LR_historical_r1i1p1_DMI-HIRHAM5_v1                       |
| 68 | EUR-11_MPI-M-MPI-ESM-LR_historical_r1i1p1_KNMI-RACMO22E_v1                     |
| 69 | EUR-11_MPI-M-MPI-ESM-LR_historical_r1i1p1_MPI-CSC-REMO2009_v1                  |
| 70 | EUR-11_MPI-M-MPI-ESM-LR_historical_r1i1p1_SMHI-RCA4_v1a                        |
| 71 | EUR-11_MPI-M-MPI-ESM-LR_historical_r1i1p1_UHOH-WRF361H_v1                      |
| 72 | own_ReKliEs-DWD_MPI-M-MPI-ESM-LR_historical_r1i1p1_CLMcom-CCLM4-8-17_v1_EUR-11 |
| 73 | own_ReKliEs-DWD_MPI-M-MPI-ESM-LR_historical_r1i1p1_MPI-CSC-REMO2009_v1_EUR-11  |
| 74 | own_ReKliEs-DWD_MPI-M-MPI-ESM-LR_historical_r1i1p1_SMHI-RCA4_v1a_EUR-11        |
| 75 | own_ReKliEs-DWD_MPI-M-MPI-ESM-LR_historical_r1i1p1_UHOH-WRF361H_v1_EUR-11      |
| 76 | EUR-11_MPI-M-MPI-ESM-LR_historical_r2i1p1_CLMcom-ETH-COSMO-crCLIM-v1-1_v1      |
| 77 | EUR-11_MPI-M-MPI-ESM-LR_historical_r2i1p1_MPI-CSC-REMO2009_v1                  |
| 78 | EUR-11_MPI-M-MPI-ESM-LR_historical_r2i1p1_SMHI-RCA4_v1                         |
| 79 | own_ReKliEs-DWD_MPI-M-MPI-ESM-LR_historical_r2i1p1_MPI-CSC-REMO2009_v1_EUR-11  |
| 80 | EUR-11_MPI-M-MPI-ESM-LR_historical_r3i1p1_CLMcom-ETH-COSMO-crCLIM-v1-1_v1      |
| 81 | EUR-11_MPI-M-MPI-ESM-LR_historical_r3i1p1_GERICS-REMO2015_v1                   |
| 82 | EUR-11_MPI-M-MPI-ESM-LR_historical_r3i1p1_SMHI-RCA4_v1                         |
| 83 | EUR-11_NCC-NorESM1-M_historical_r1i1p1_CLMcom-ETH-COSMO-crCLIM-v1-1_v1         |
| 84 | EUR-11_NCC-NorESM1-M_historical_r1i1p1_CNRM-ALADIN63_v1                        |
| 85 | EUR-11_NCC-NorESM1-M_historical_r1i1p1_DMI-HIRHAM5_v3                          |
| 86 | EUR-11_NCC-NorESM1-M_historical_r1i1p1_GERICS-REMO2015_v1                      |
| 87 | EUR-11_NCC-NorESM1-M_historical_r1i1p1_KNMI-RACMO22E_v1                        |
| 88 | EUR-11_NCC-NorESM1-M_historical_r1i1p1_SMHI-RCA4_v1                            |
| 89 | EUR-11_NOAA-GFDL-GFDL-ESM2G_historical_r1i1p1_GERICS-REMO2015_v1               |

**Table S3:** List of error metrics used in the study

| <b>Number</b> | <b>Metrics</b>                            | <b>Abbreviation</b> |
|---------------|-------------------------------------------|---------------------|
| 1             | Anomaly Correlation Coefficient           | ACC                 |
| 2             | Index of Agreement                        | d                   |
| 3             | Legate-McCabe Index of Agreement          | D1                  |
| 4             | Index of Agreement                        | d1                  |
| 5             | Modified Index of Agreement               | d (Mod.)            |
| 6             | Index of Agreement Refined                | dr                  |
| 7             | Euclidean Distance                        | ED                  |
| 8             | Mean Absolute H10 Error                   | H10 (MAHE)          |
| 9             | Inertial Root Mean Square Error           | IRMSE               |
| 10            | Kling-Gupta Efficiency (2009)             | KGE (2009)          |
| 11            | Kling-Gupta Efficiency (2012)             | KGE (2012)          |
| 12            | Legate-McCabe Efficiency Index            | E1                  |
| 13            | Mean Absolute Error                       | MAE                 |
| 14            | Mean Absolute Log Error                   | MALE                |
| 15            | Mean Absolute Percentage Deviation        | MAPD                |
| 16            | Mean Absolute Scaled Error                | MASE                |
| 17            | Mielke-Berry R                            | (MB) R              |
| 18            | Median Absolute Error                     | MdAE                |
| 19            | Median Error                              | MdE                 |
| 20            | Median Squared Error                      | MdSE                |
| 21            | Mean Error                                | MEE                 |
| 22            | Mean Variance                             | MV                  |
| 23            | Mean Squared Error                        | MSE                 |
| 24            | Normalized Eclidean Distance              | NED                 |
| 25            | Normalized Root Mean Square Error - IQR   | NRMSE (IQR)         |
| 26            | Normalized Root Mean Square Error - Mean  | NRMSE (Mean)        |
| 27            | Normalized Root Mean Square Error - Range | NRMSE (Range)       |
| 28            | Nash-Sutcliffe Efficiency                 | NSE                 |
| 29            | Modified Nash-Sutcliffe Efficiency        | NSE (Mod.)          |
| 30            | Pearson Correlation Coefficient           | R (Pearson))        |
| 31            | Coefficient of Determination              | r <sup>2</sup>      |
| 32            | Root Mean Square Error                    | RMSE                |
| 33            | Spectral Angle                            | SA                  |
| 34            | Spectral Correlation                      | SCO                 |
| 35            | Spectral Gradient Angle                   | SGA                 |
| 36            | Spearman Rank Correlation Coefficient     | R (Spearman)        |
| 37            | Volumetric Efficiency                     | VE                  |
| 38            | Watterson s M                             | M                   |

## Supplementary Text

### Text S1

To evaluate the effectiveness of the non-parametric clustering (Np) method used in this study, it is compared to K-means clustering (Hartigan & Wong, 1979) for both precipitation and temperature in all the eight regions. K-means is also a non-parametric clustering and it has been selected for comparison with the Np clustering because of its popularity and robust framework. For K-means clustering, the ranking order of each metric is pooled together for all grid points as a single column matrix and used as a feature vector for that region and error metric. The mean absolute error is then computed for all possible combinations of error metrics within a cluster and presented as a box plot in Figure S26. The results show that the MAE produced by the Np clustering method is lower than that produced by K-means clustering for all regions in both precipitation and temperature. Therefore, the Np clustering method is selected as the preferred approach for classifying the error metrics in the study.

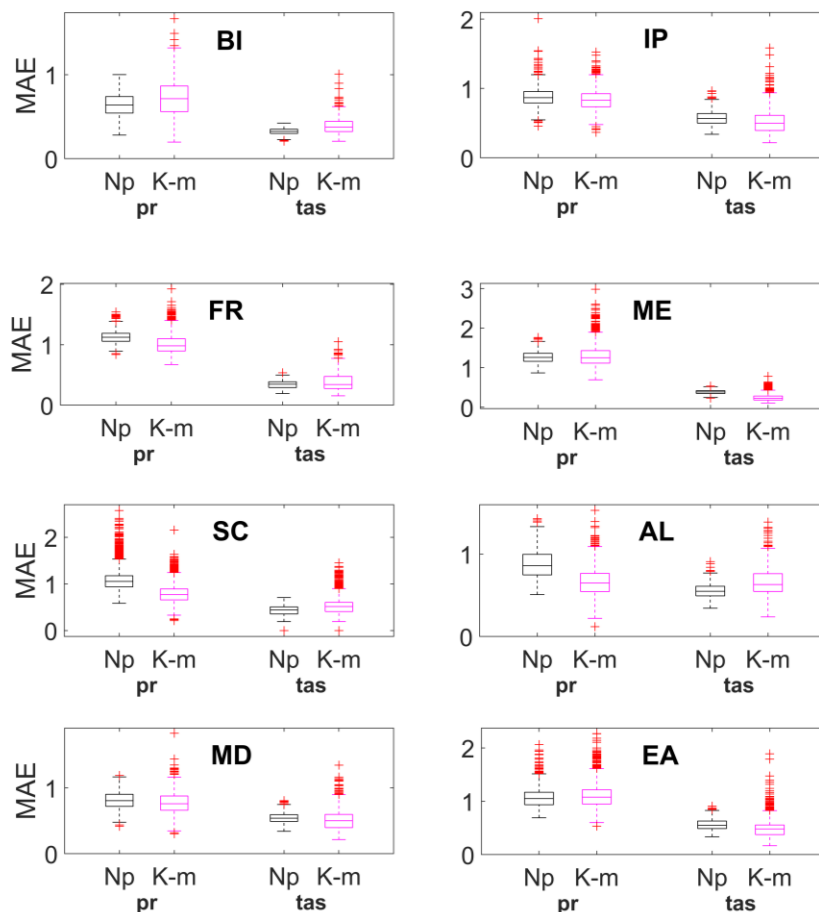

**Figure S26:** A comparison between the non-parametric clustering (Np) adopted in the study and K-means clustering (K-m) using MAE for both precipitation and temperature and for all the eight regions

## Text S2

The clustering of error metrics using ranking order has led to a significant reduction in the number of error metrics. This enables the use of a single error metric from each cluster to calculate the Bergen metric, as explained in the methodology section. However, it is still a challenge to choose a metric from each cluster. The study assumes that random selection of a metric from the cluster will not have any effect on the ranking order produced by Bergen metric. To validate it, we conducted 10 experiments for both precipitation and temperature, whereby a metric is randomly drawn from each cluster, and the Bergen metric is computed for each experiment and for all the climate models across each grid points in Europe. The study then identifies the best model for each grid point using the Bergen metric and a histogram is generated to display the frequency of each model being identified as the best. Figure S27 shows no differences between the experiments conducted in both precipitation and temperature, indicating that randomly selecting a metric from each cluster do not affect the ranking order produced by the Bergen metric.

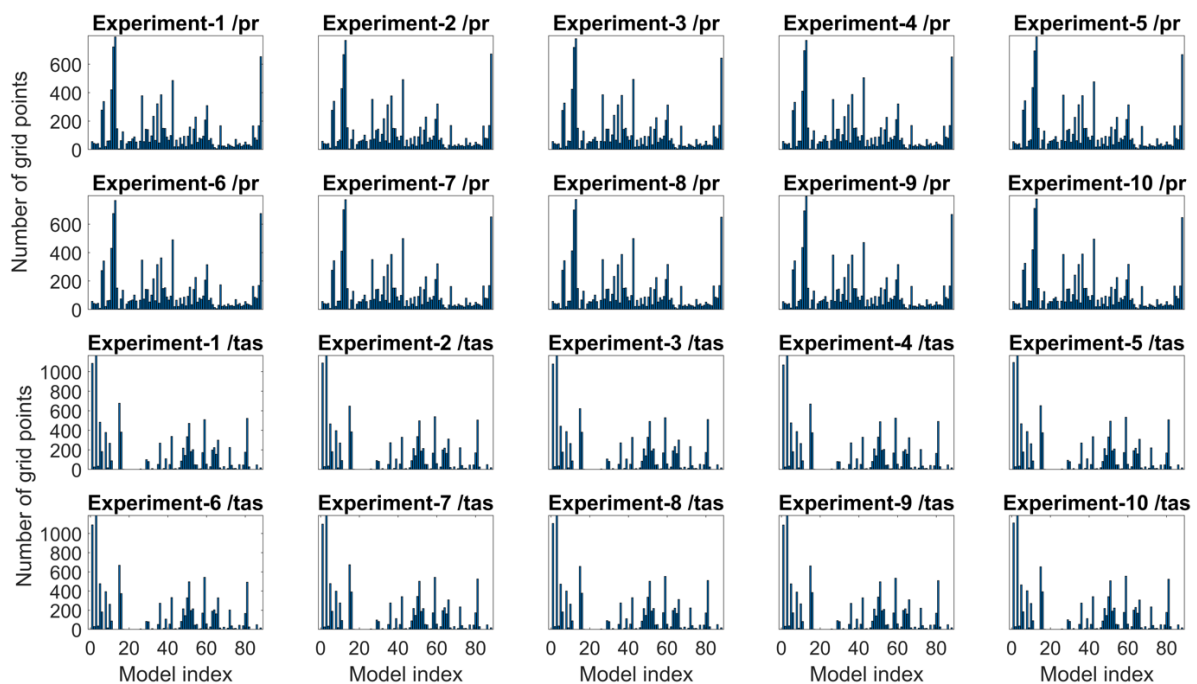

**Figure S27:** Influence on Bergen metric by the random selection of error metric
